# Supplementary material for: Opposite initialization to novel cues in dopamine signaling in ventral and posterior striatum in mice
Source: eLife journal article supplement (doi:10.7554/elife.21886), 2017-01-05

**Figure 4 - figure supplement 3**

**A**

Odor discrimination in trained animals

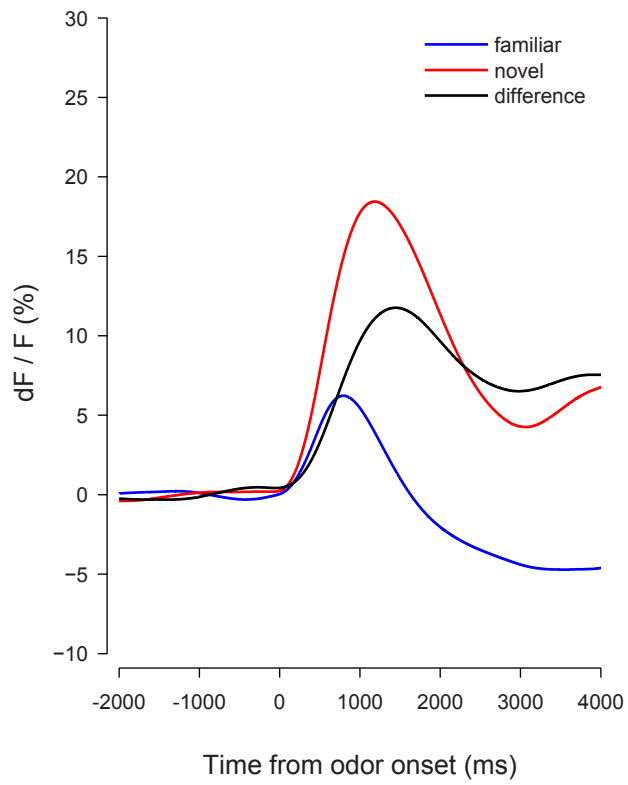

**B**

Novel odor discrimination latency

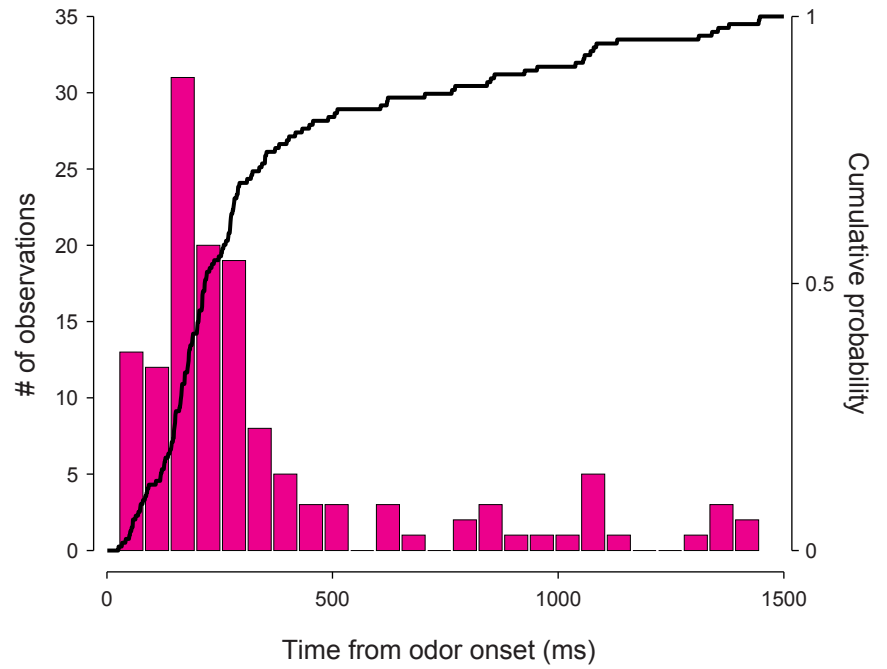

Supplement: supp [file elife_poa_e21886_Figure_4_figure_supplement_3.pdf › elife_poa_e21886_Figure_4_figure_supplement_3.pdf]
