# Supplementary figures and images for: Opposite initialization to novel cues in dopamine signaling in ventral and posterior striatum in mice
Source: eLife journal article supplement (doi:10.7554/elife.21886), 2017-01-05

Figure 1 - figure supplement 1

A

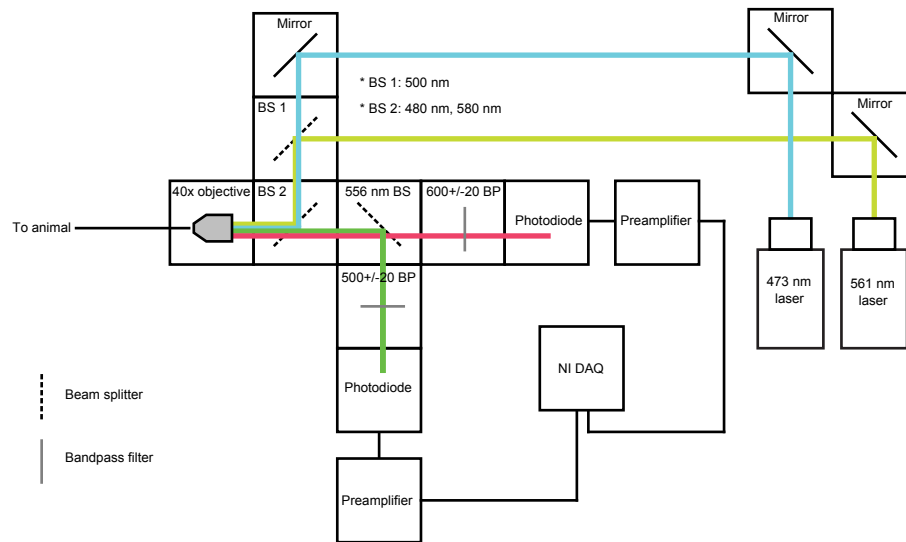

B

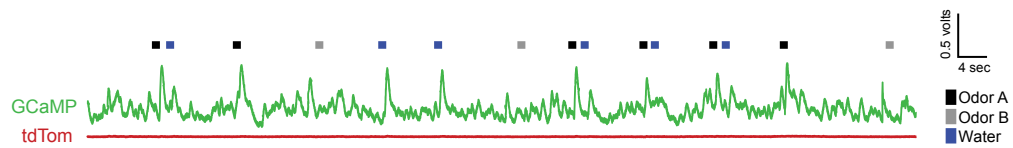

C

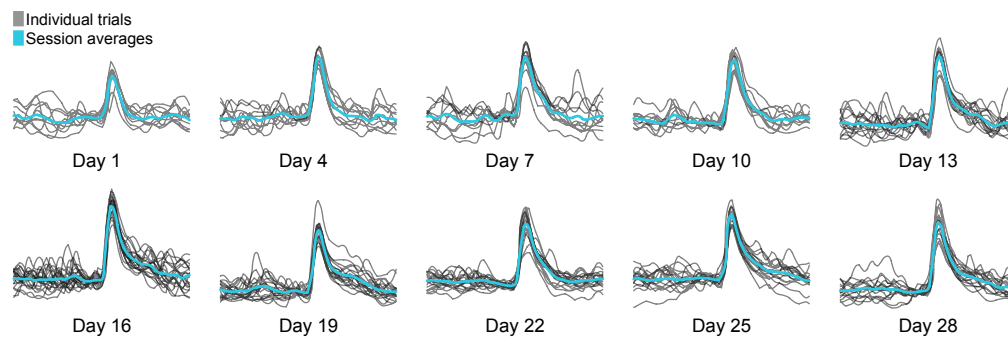

Supplement: supp [file elife_poa_e21886_Figure1_figure_Supplement_1.pdf › elife_poa_e21886_Figure1_figure_Supplement_1.pdf]

**Figure 2 - figure supplement 1**

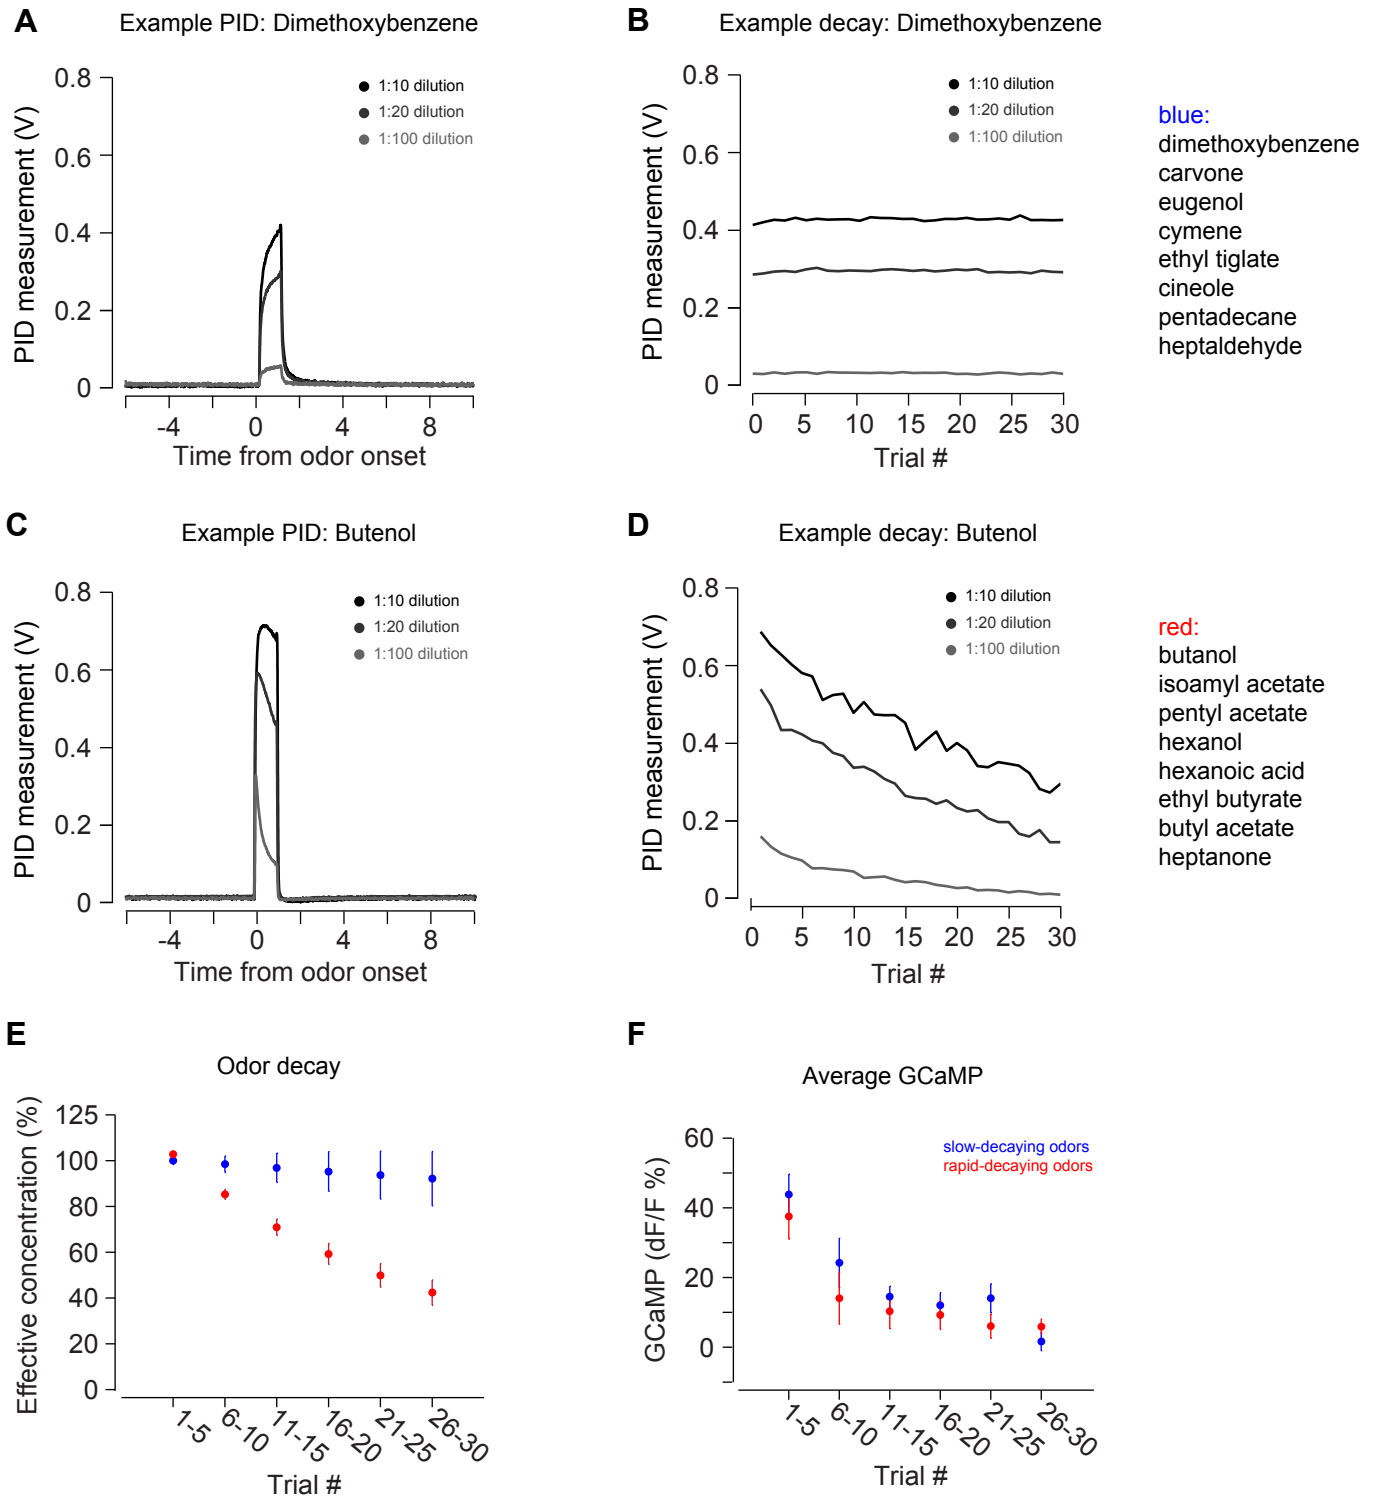

Supplement: supp [file elife_poa_e21886_Figure_2_figure_supplement_1.pdf › elife_poa_e21886_Figure_2_figure_supplement_1.pdf]

**Figure 2 - figure supplement 2**

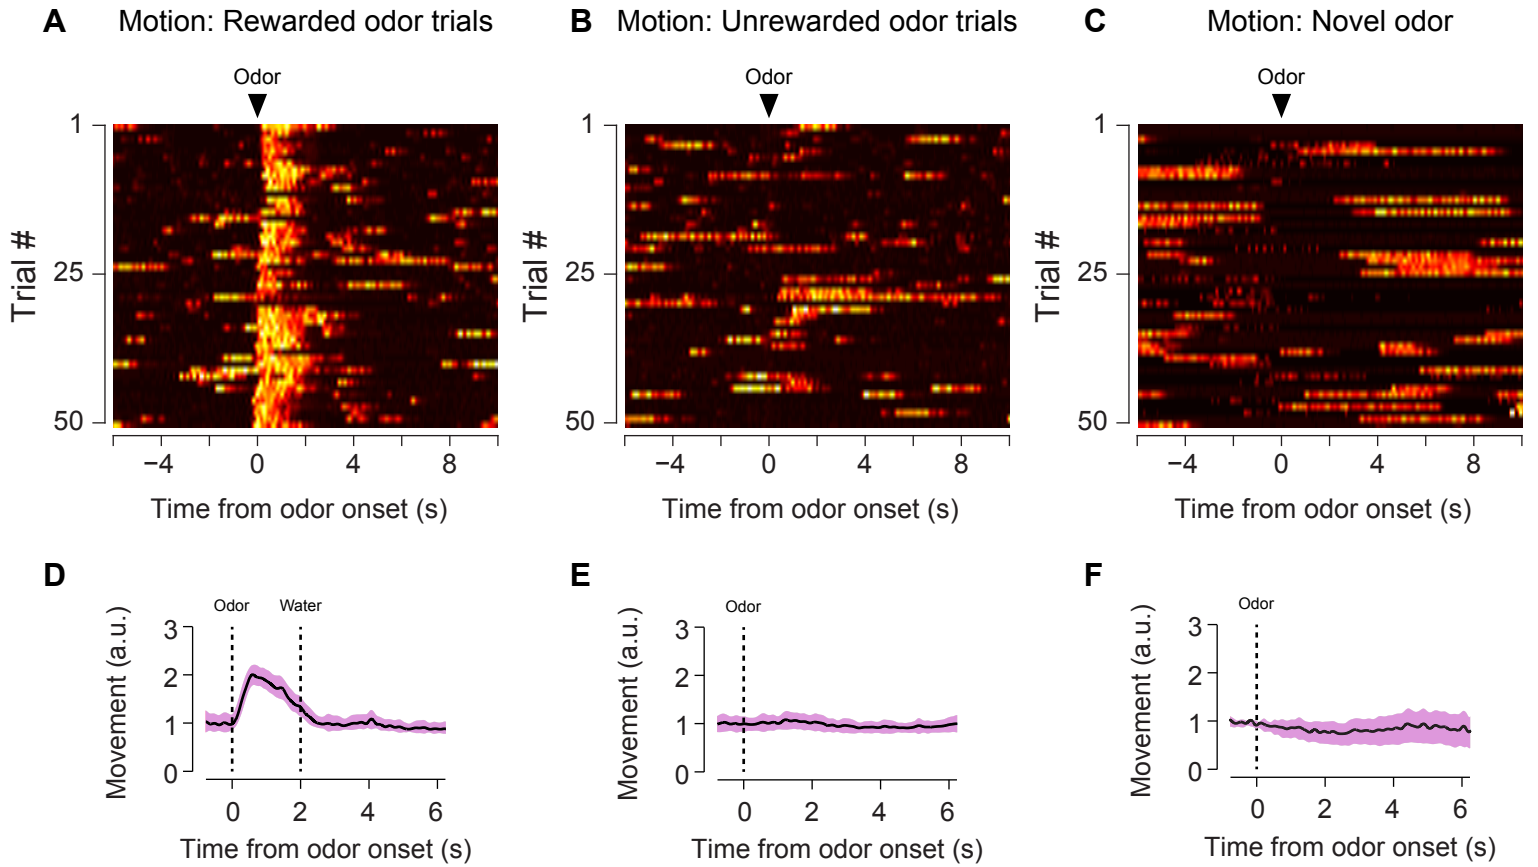

Supplement: supp [file elife_poa_e21886_Figure_2_figure_supplement_2.pdf › elife_poa_e21886_Figure_2_figure_supplement_2.pdf]

**Figure 2 - figure supplement 3**

VS free water

TS free water

TS familiar odor

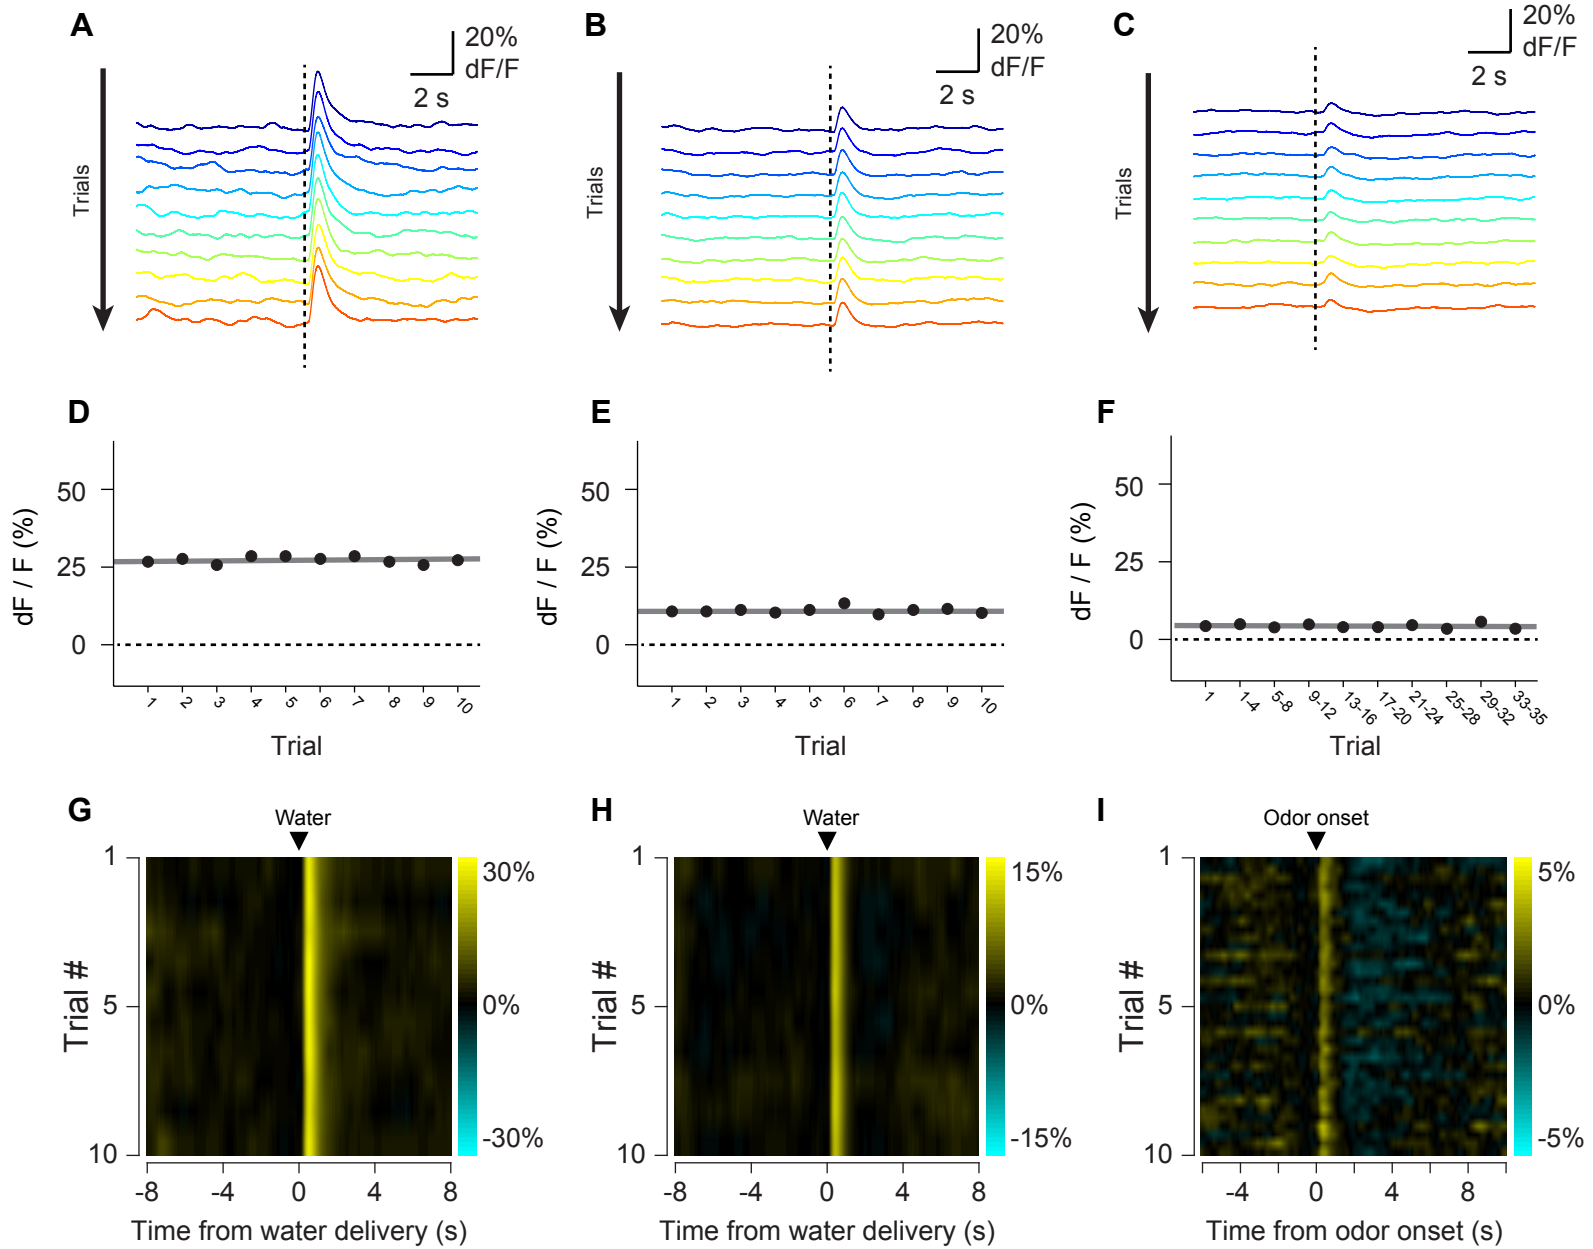

Supplement: supp [file elife_poa_e21886_Figure_2_figure_supplement_3.pdf › elife_poa_e21886_Figure_2_figure_supplement_3.pdf]

**Figure 2 - figure supplement 4**

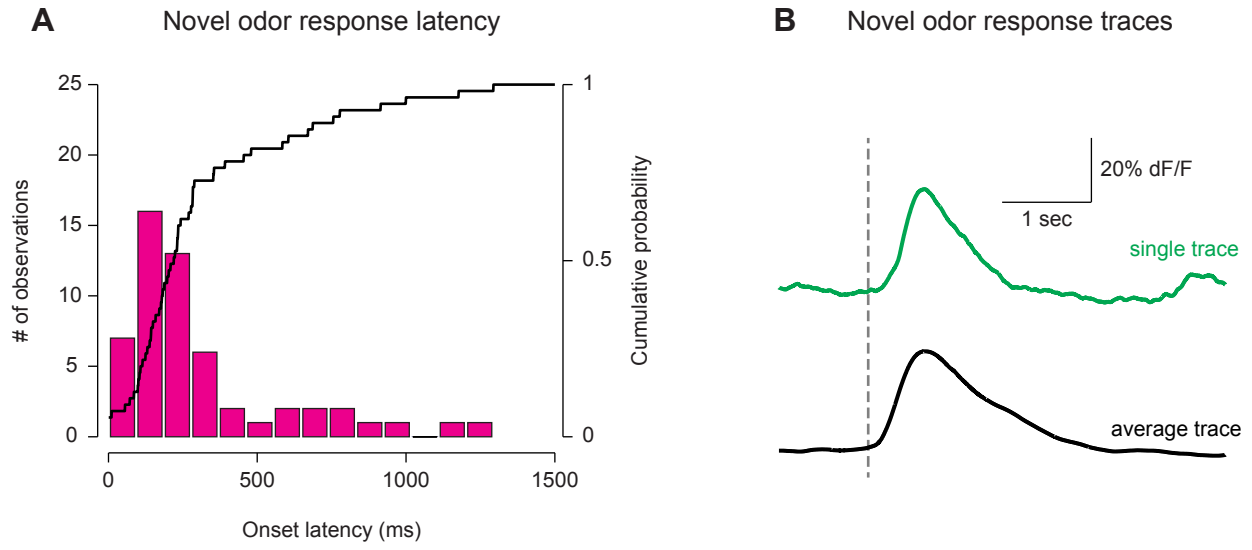

Supplement: supp [file elife_poa_e21886_Figure_2_figure_supplement_4.pdf › elife_poa_e21886_Figure_2_figure_supplement_4.pdf]

**Figure 4 - figure supplement 1**

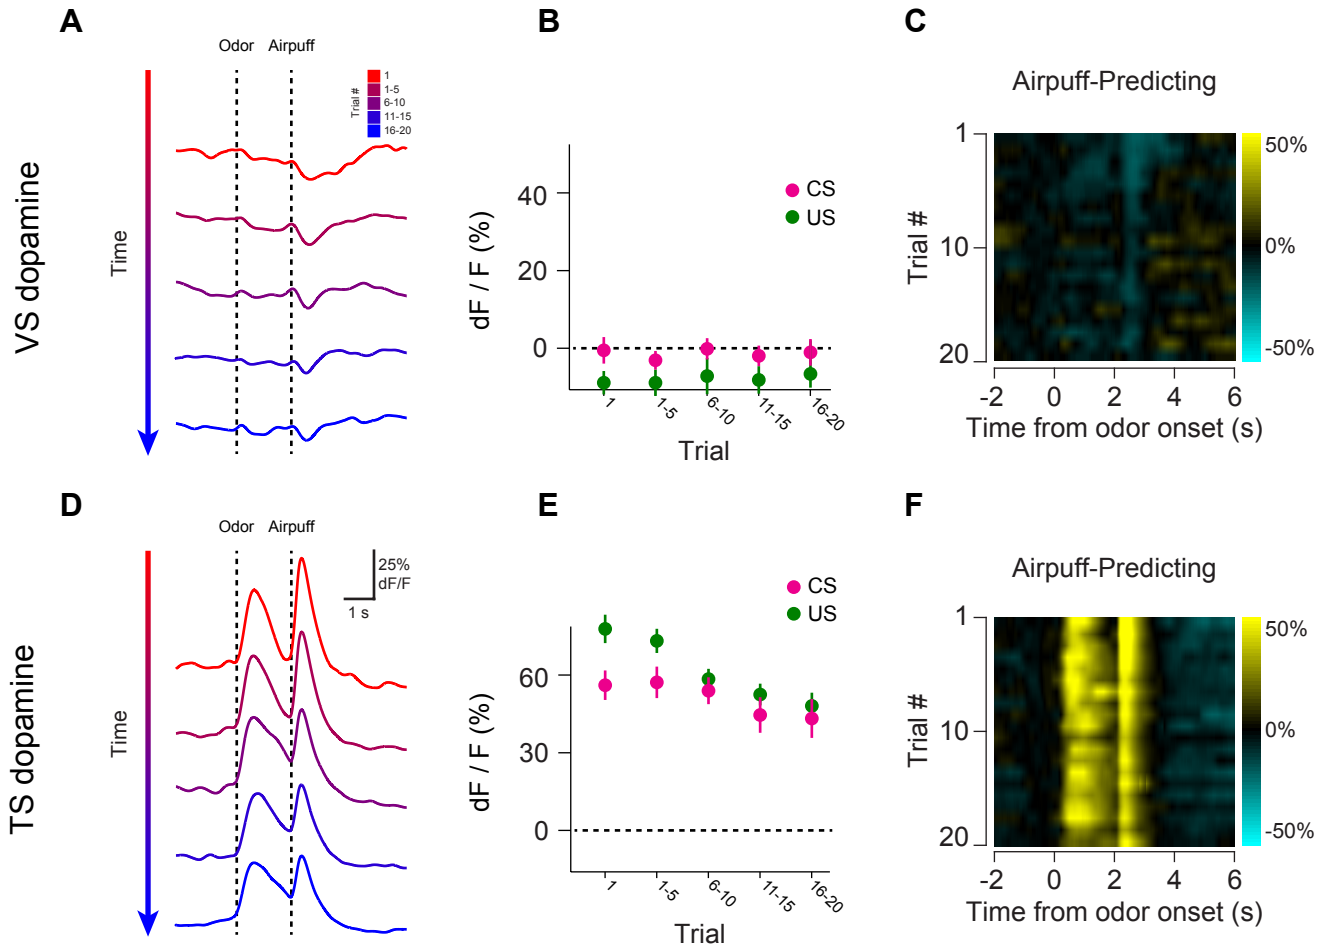

Supplement: supp [file elife_poa_e21886_Figure_4_figure_supplement_1.pdf › elife_poa_e21886_Figure_4_figure_supplement_1.pdf]

**Figure 4 - figure supplement 2**

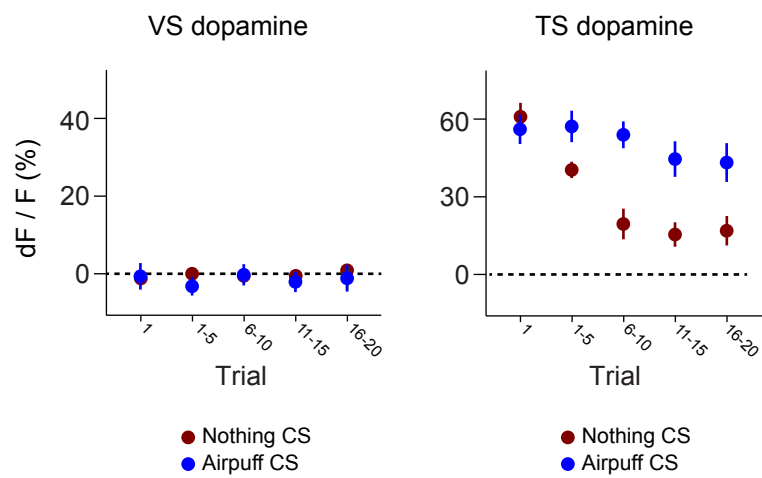

Supplement: supp [file elife_poa_e21886_Figure_4_figure_supplement_2.pdf › elife_poa_e21886_Figure_4_figure_supplement_2.pdf]

**Figure 5 - figure supplement 1**

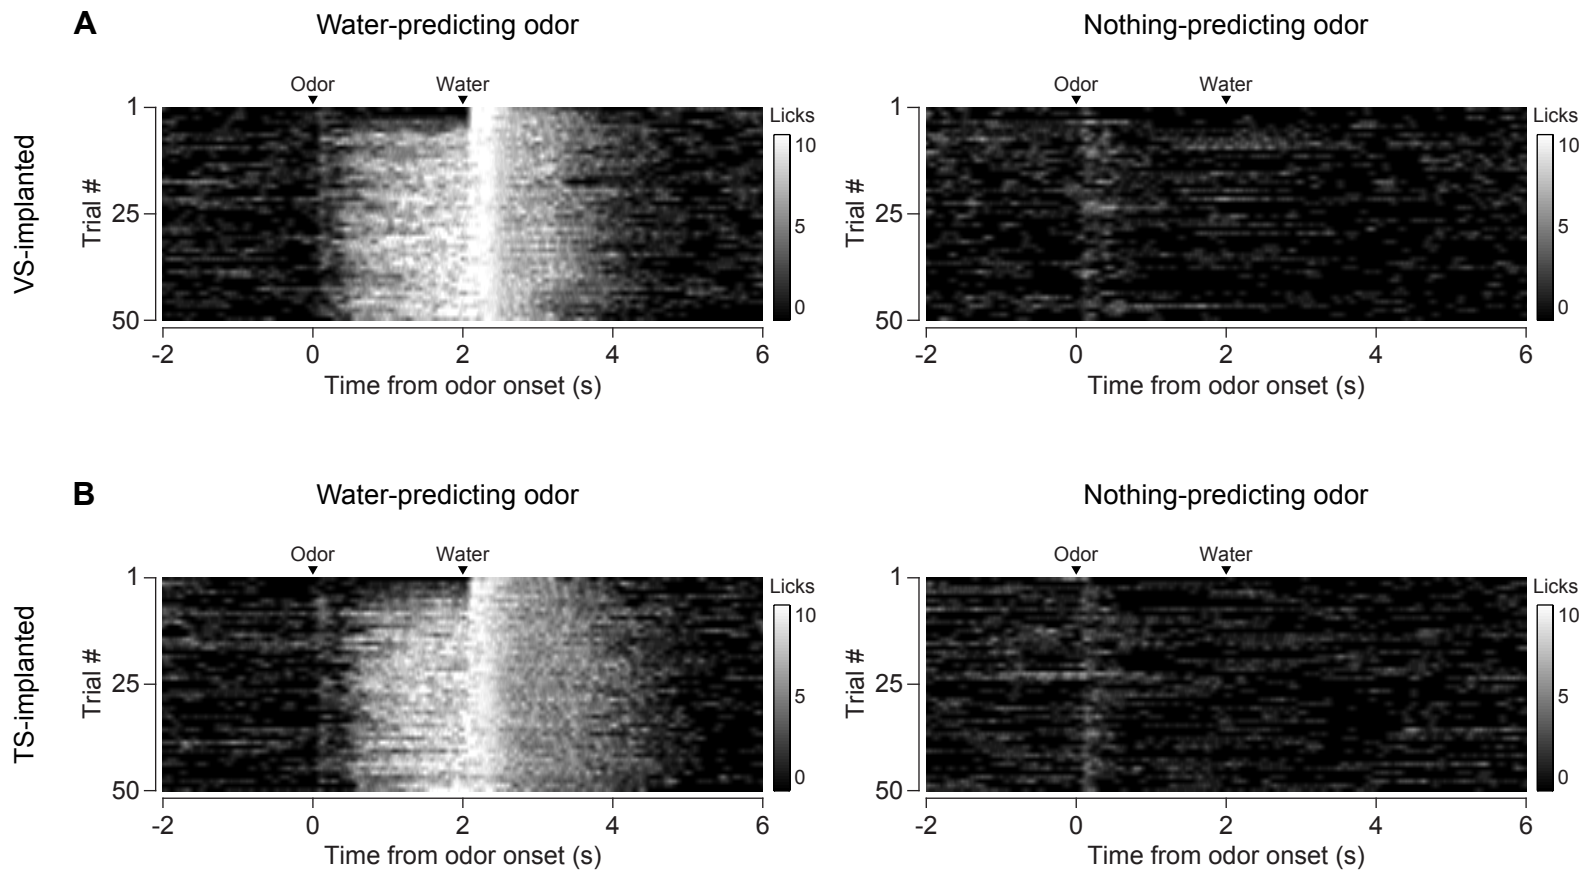

Supplement: supp [file elife_poa_e21886_Figure_5_figure_supplement_1.pdf › elife_poa_e21886_Figure_5_figure_supplement_1.pdf]

**Figure 5 - figure supplement 2**

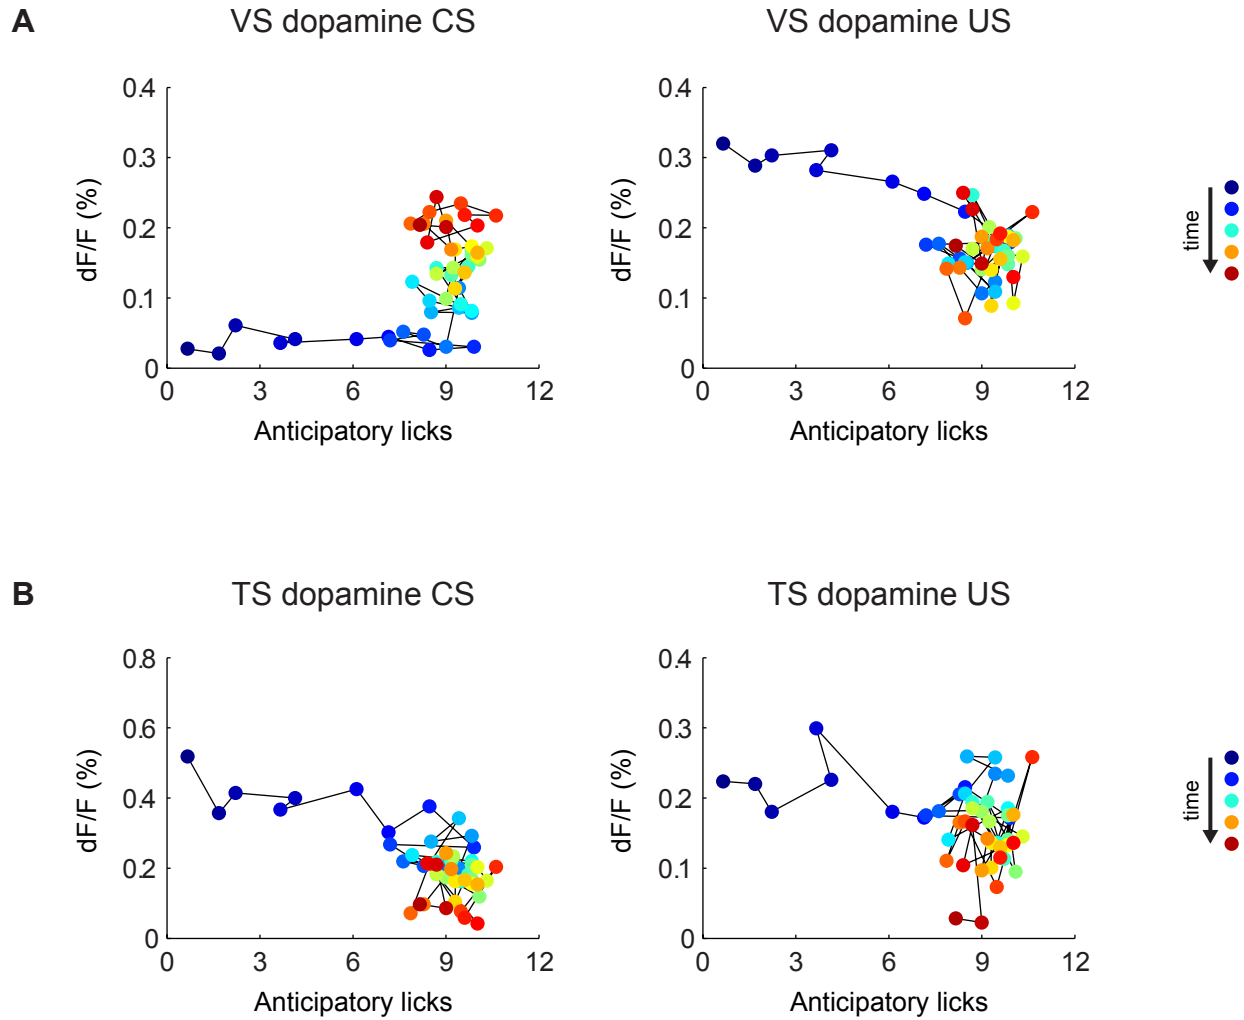

Supplement: supp [file elife_poa_e21886_Figure_5_figure_supplement_2.pdf › elife_poa_e21886_Figure_5_figure_supplement_2.pdf]

Figure 6 - figure supplement 1

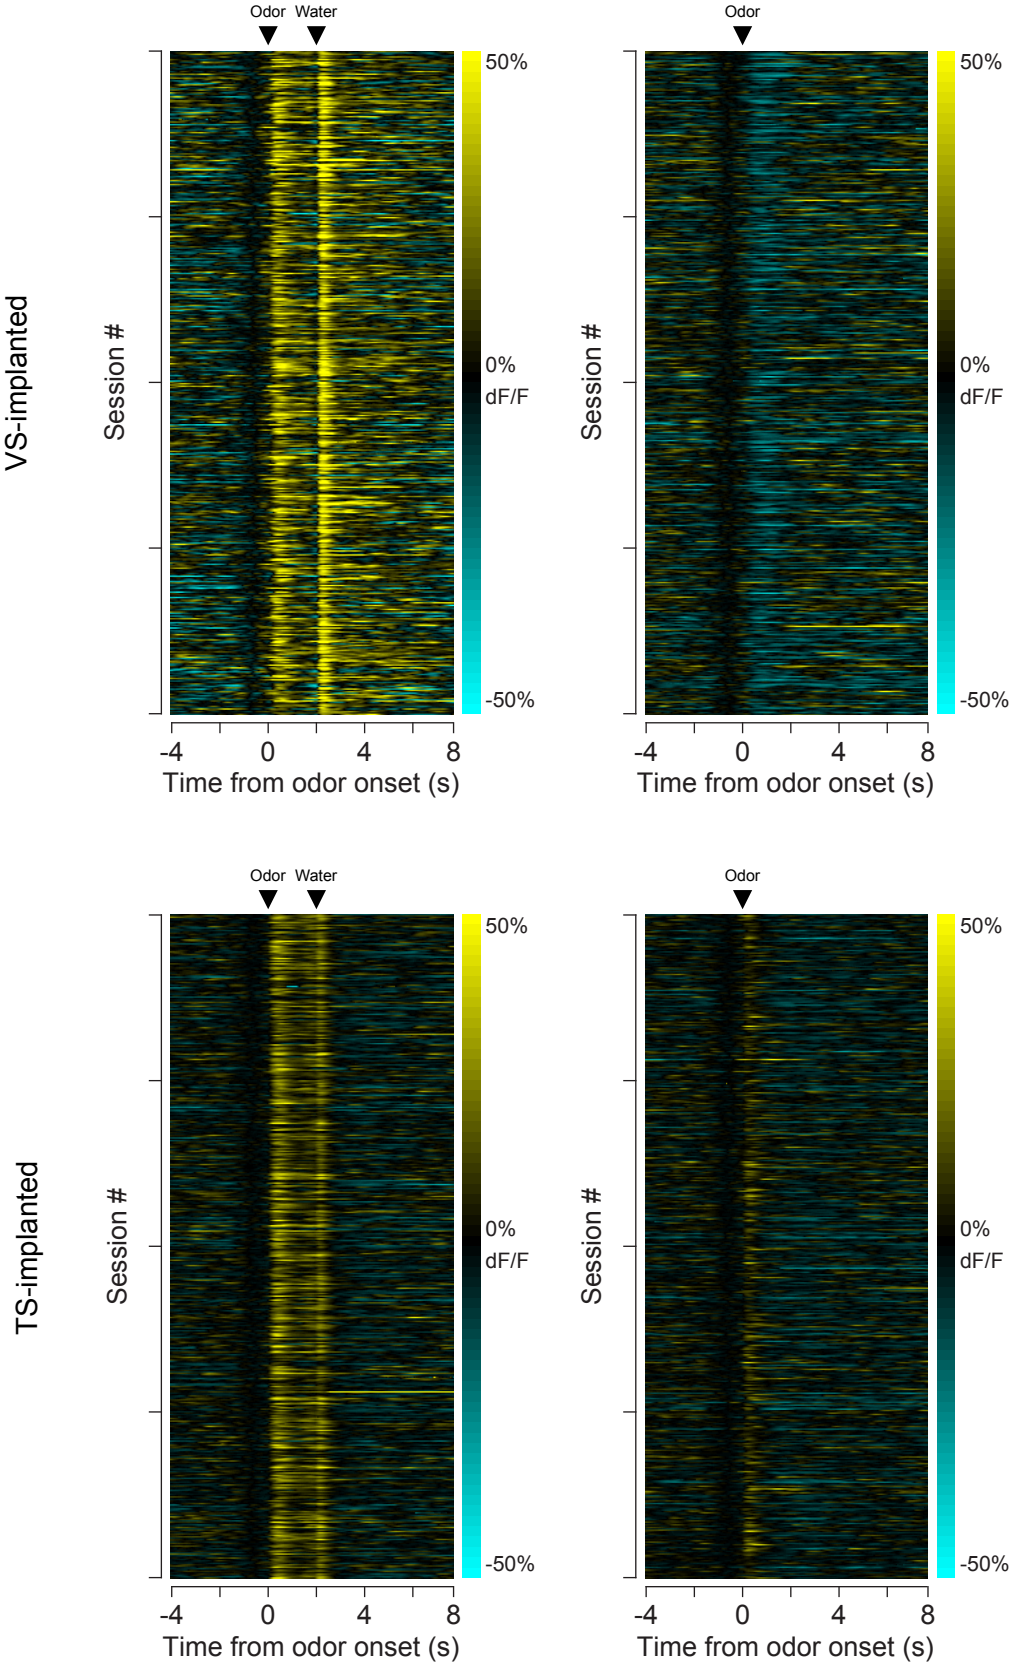

Supplement: supp [file elife_poa_e21886_Figure_6_figure_supplement_1.pdf › elife_poa_e21886_Figure_6_figure_supplement_1.pdf]

Figure 6 - figure supplement 2

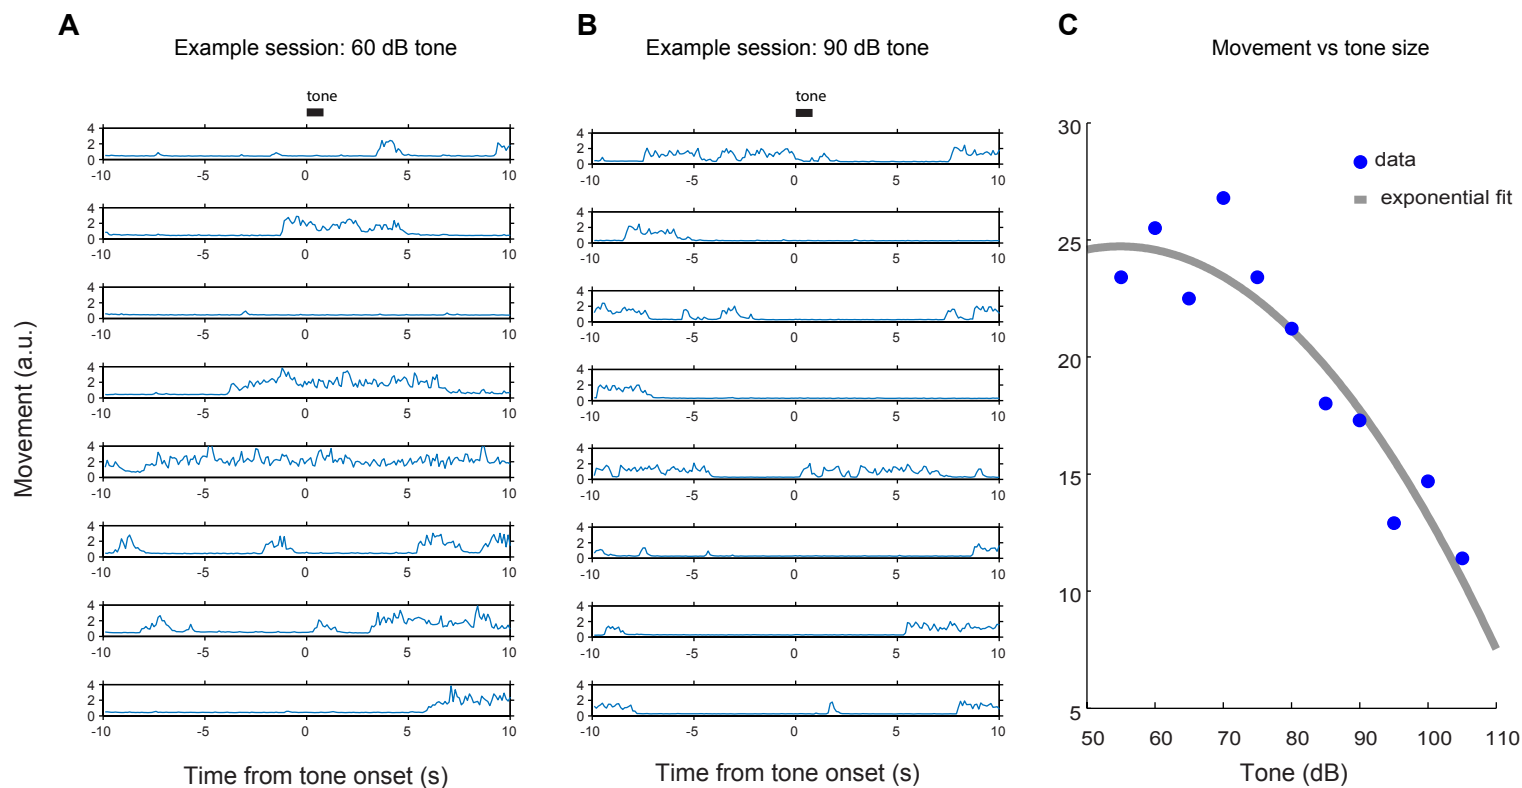

Supplement: supp [file elife_poa_e21886_Figure_6_figure_supplement_2.pdf › elife_poa_e21886_Figure_6_figure_supplement_2.pdf]

# Figure 7 - figure supplement 1

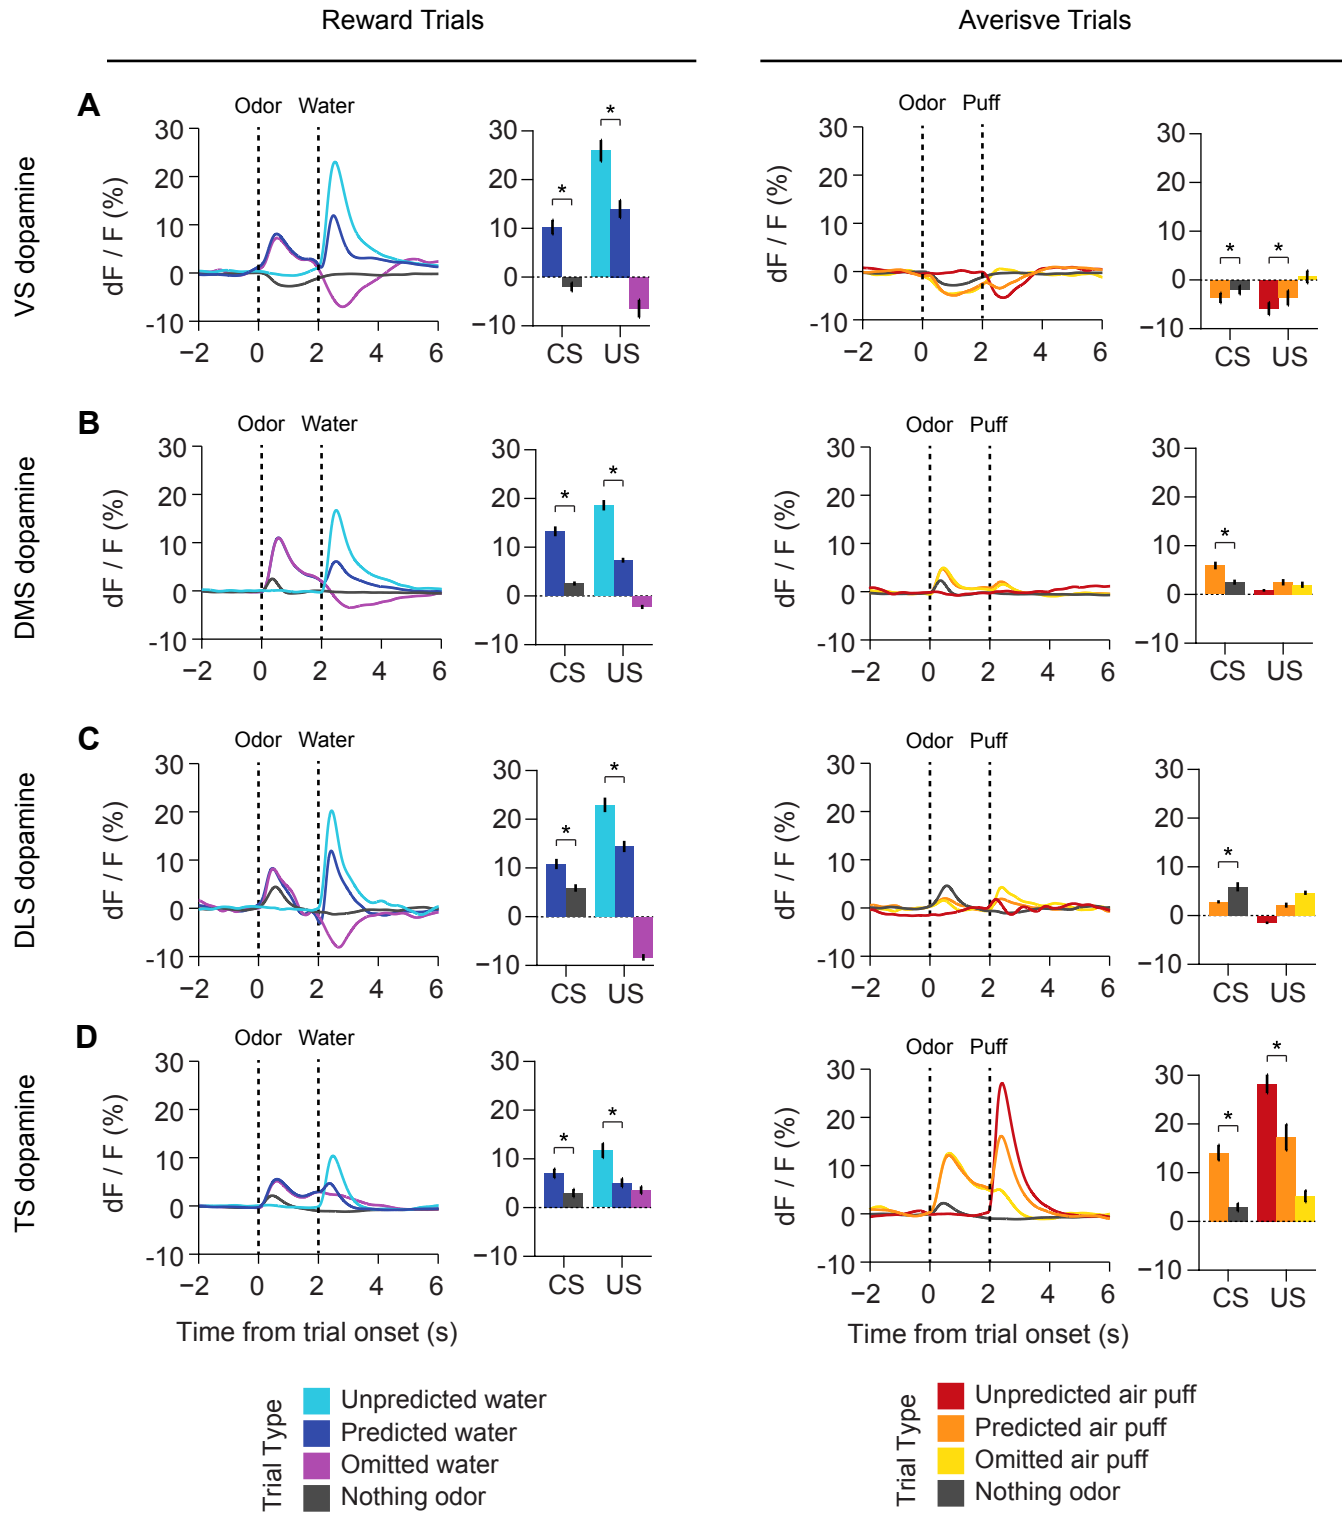

Supplement: supp [file elife_poa_e21886_Figure_7_figure_supplement_1.pdf › elife_poa_e21886_Figure_7_figure_supplement_1.pdf]

**Figure 7 - figure supplement 2**

Montage

VS implant site

TS implant site

**A**

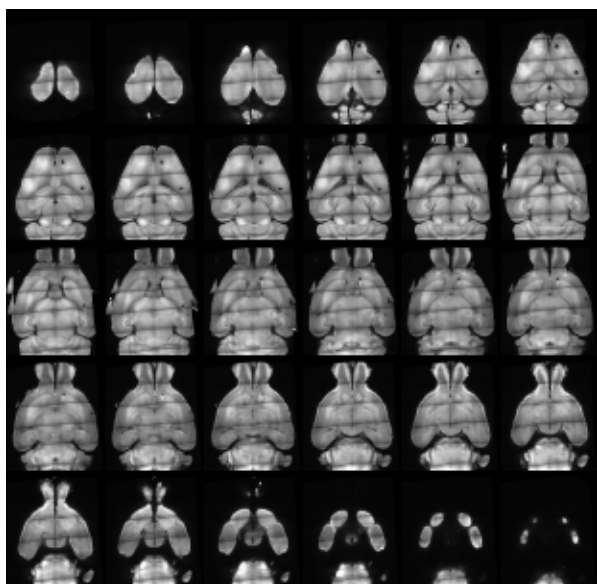

10mm

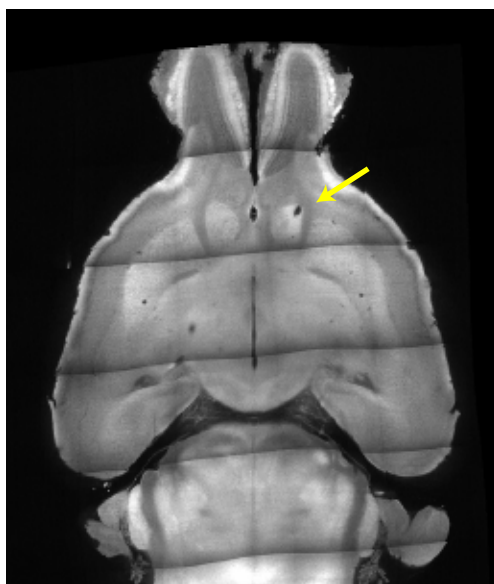

2mm

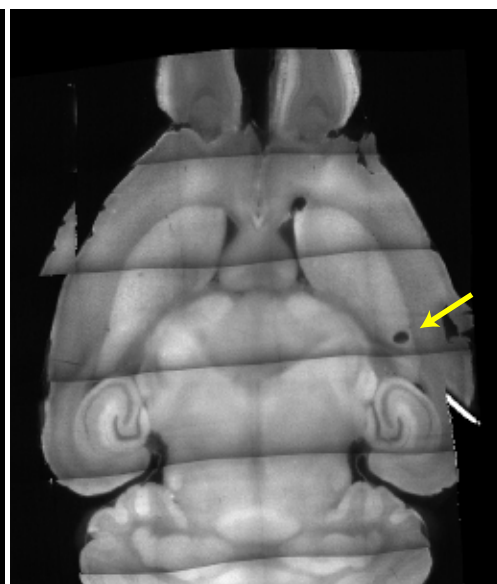

2mm

**B**

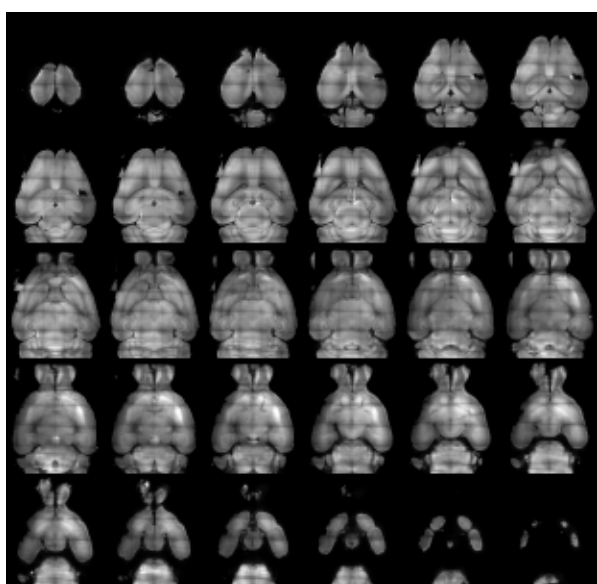

10mm

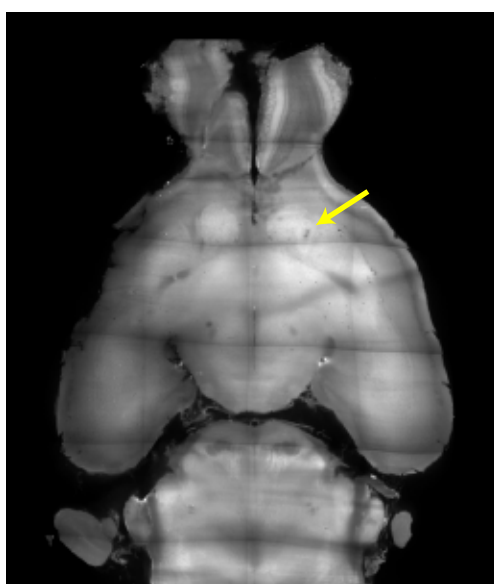

2mm

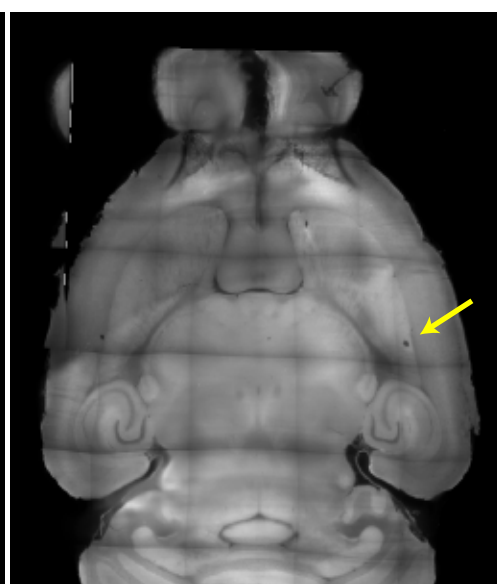

2mm

Supplement: supp [file elife_poa_e21886_Figure_7_figure_supplement_2.pdf › elife_poa_e21886_Figure_7_figure_supplement_2.pdf]

**Figure 1 - figure supplement 2**

VS-implanted example session

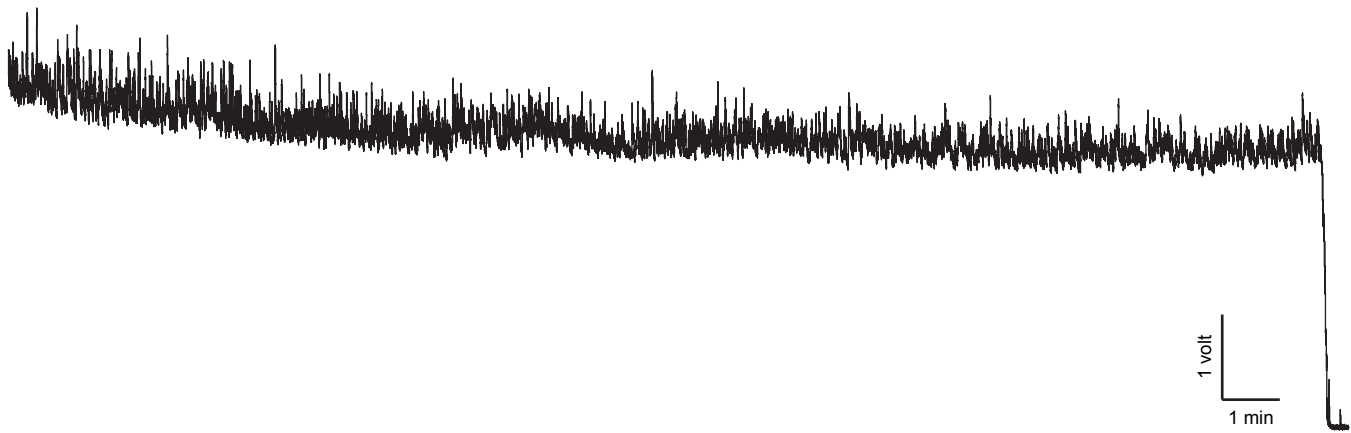

TS-implanted example session

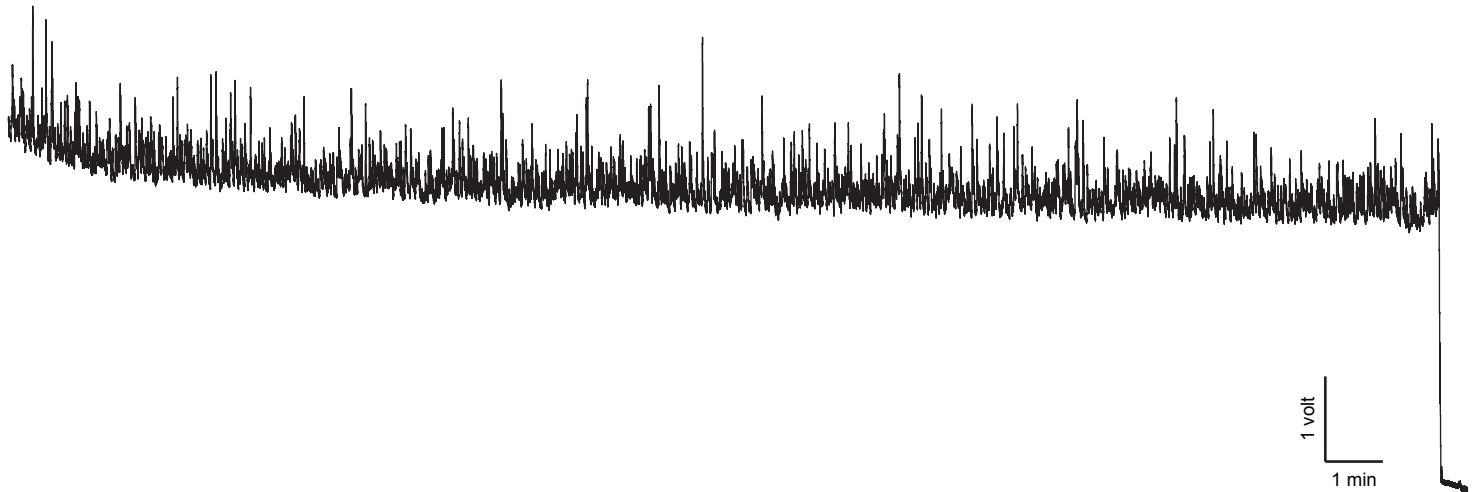

Supplement: supp [file elife_poa_e21886_figure1_Figure_Supplement2.pdf › elife_poa_e21886_figure1_Figure_Supplement2.pdf]

Figure 1 - figure supplement 3

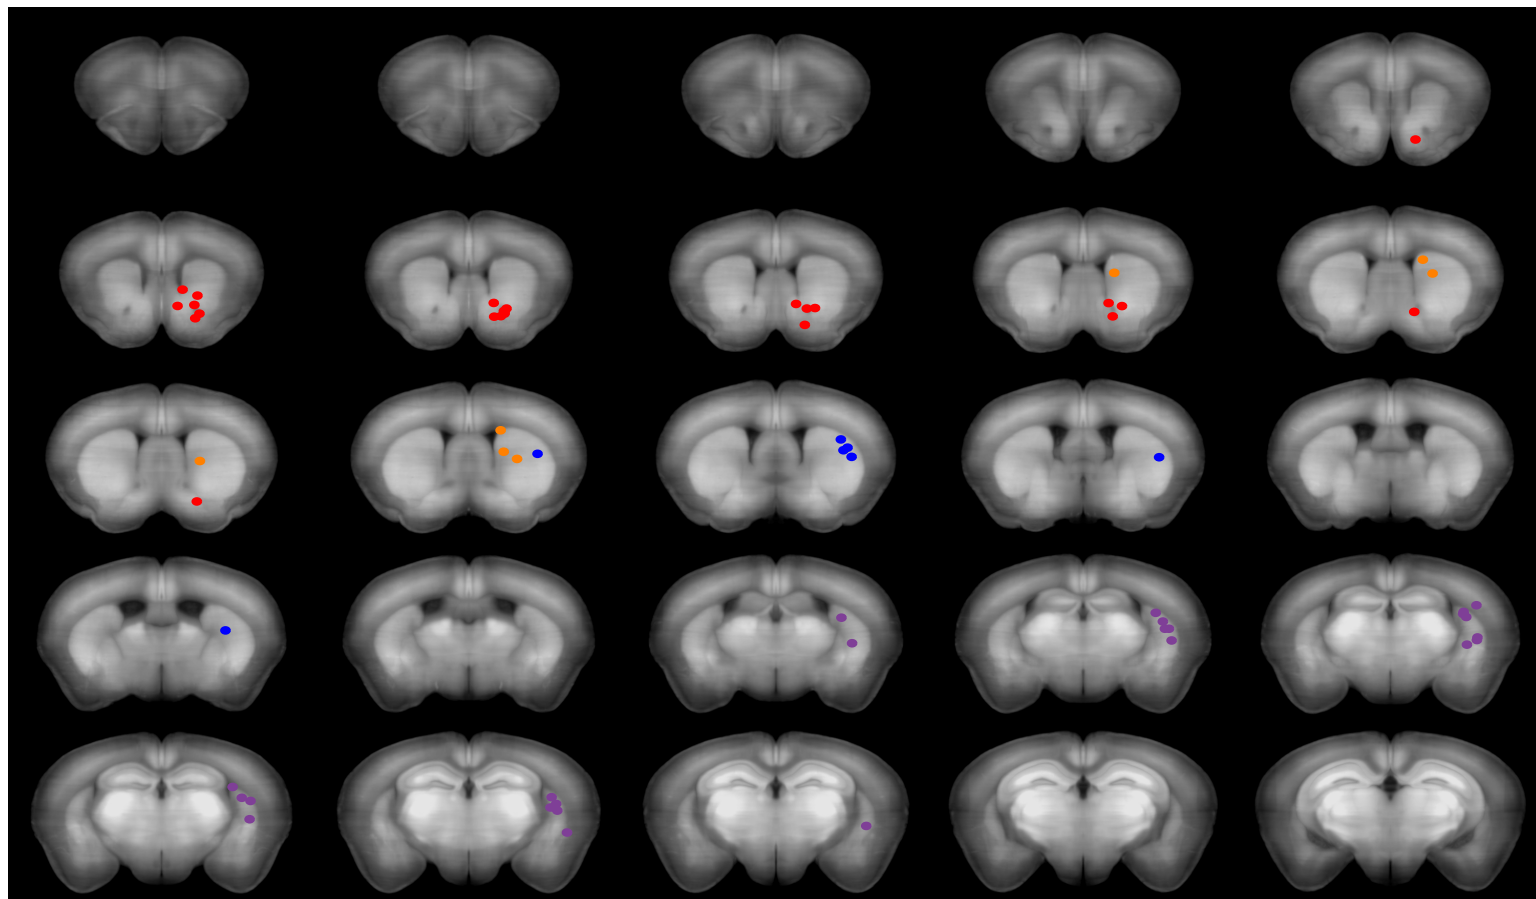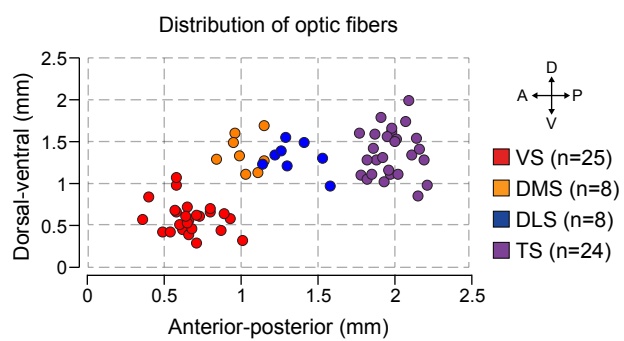

Supplement: supp [file elife_poa_e21886_figure1_Figure_Supplement3.pdf › elife_poa_e21886_figure1_Figure_Supplement3.pdf]

**Figure 1 - figure supplement 4**

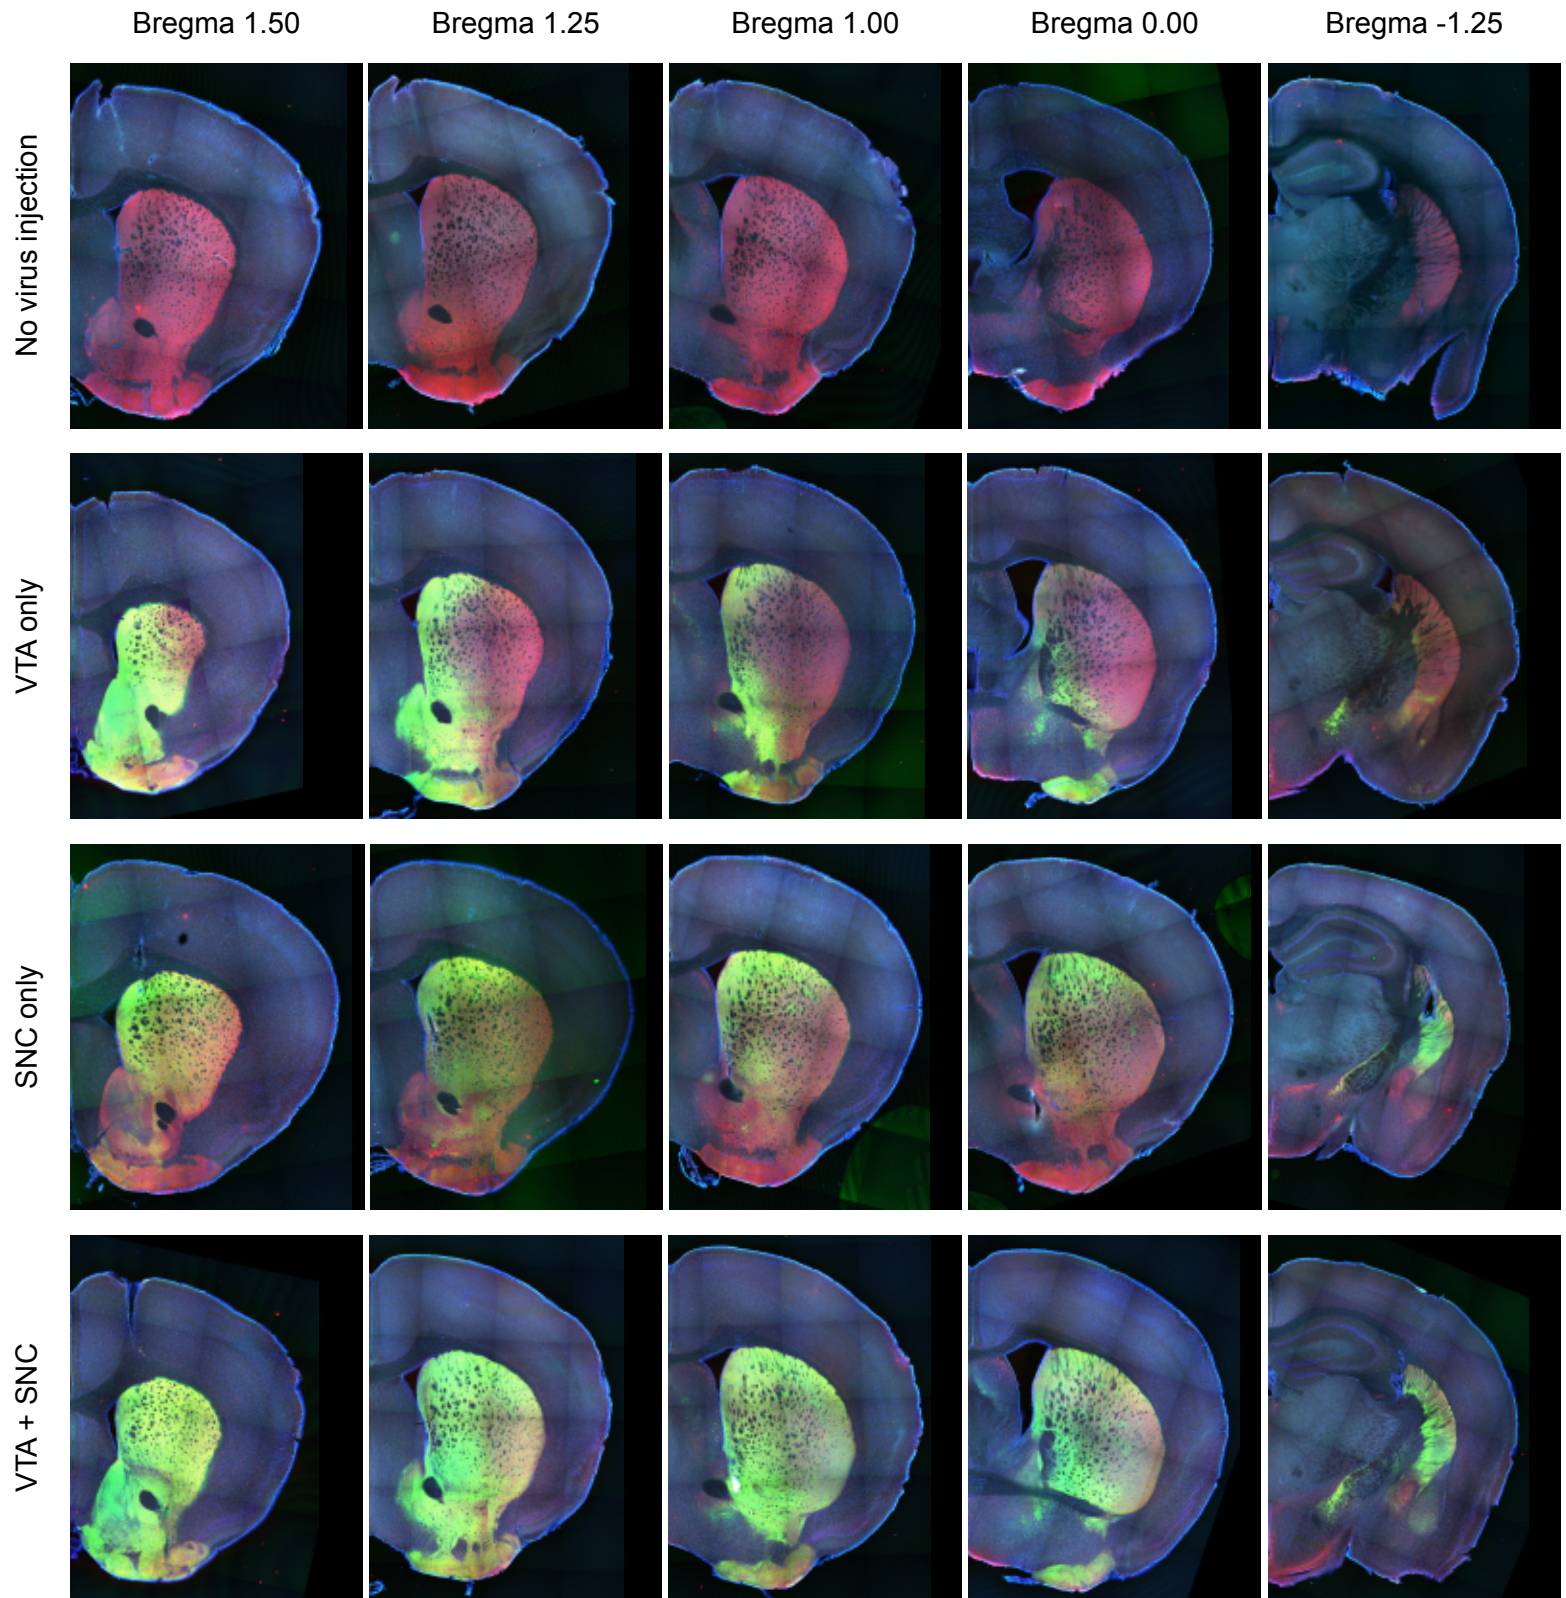

Supplement: supp [file elife_poa_e21886_figure1_Figure_Supplement4.pdf › elife_poa_e21886_figure1_Figure_Supplement4.pdf]

**Figure 3 - figure supplement 1**

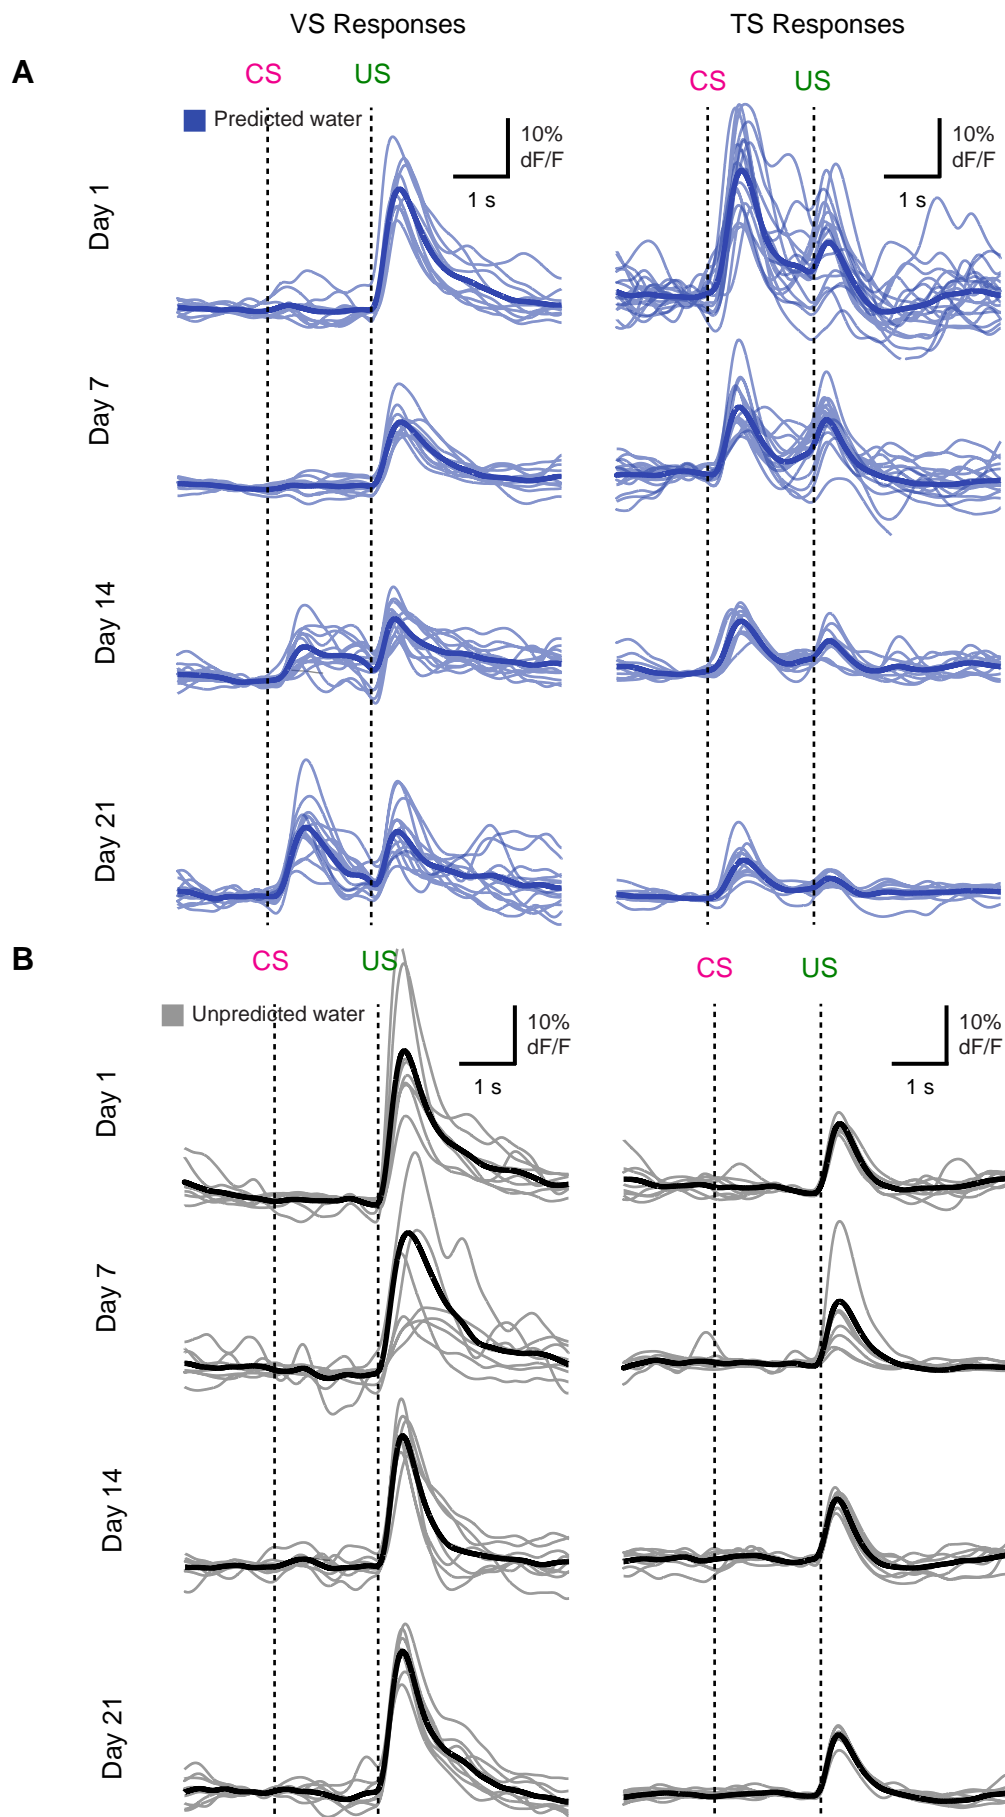

Supplement: supp [file elife_poa_e21886_figure3_Figure_Supplement1.pdf › elife_poa_e21886_figure3_Figure_Supplement1.pdf]
